# Supplementary material for: Flexible paper-based solid state ionic diodes
Source: Royal Society of Chemistry journal article supplement (doi:10.1039/c3ra43300e), 2013-01-01
Supplement: c3ra43300e.pdf [file c3ra43300e.pdf]

## Flexible paper-based solid state ionic diodes

Rui Zhao,<sup>‡a</sup> Xiaodan Zhang,<sup>‡b</sup> Jiping Xu,<sup>a</sup> Yang Yang,<sup>c</sup> and Gaohong He,<sup>\*a</sup>

<sup>a</sup>State Key Laboratory of Fine Chemicals, R&D Center of Membrane Science and Technology, Dalian University of Technology, Dalian 116024, China. Tel: +86411 84986291; Fax: +86 411 84986291; E-mail: [hgaohong@dlut.edu.cn](mailto:hgaohong@dlut.edu.cn)

<sup>b</sup>School of Materials Science & Engineering and IPST at GT, Georgia Institute of Technology, Atlanta, GA 30318, USA.

<sup>c</sup>PetroChina Liaoyang petrochemical company, Liaoyang 111003, China.

‡ These authors contribute equally to this work.

### Supporting information:

In order to study the existence of water, FTIR spectroscopy was tested for pure PEO 20000, AgNO<sub>3</sub> FIL and KI FIL. The absorption peaks around 3500 cm<sup>-1</sup> demonstrated the existence of water. It is hard to confirm if water molecules exist in all samples because many water molecules were involved by KBr wafer during measurement. However, the peak of KI FIL is obviously higher than the others, which means water molecules must exist in the KI FIL due to the hygroscopicity of KI.

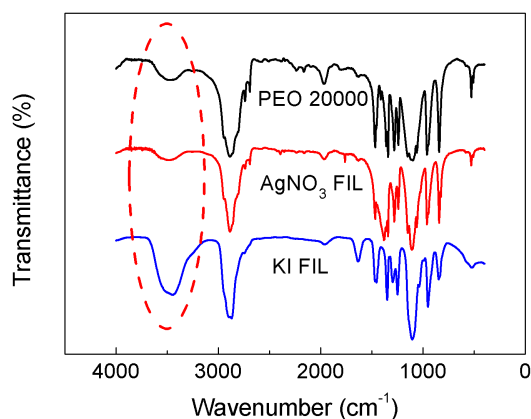

FTIR spectrums of PEO 20000, AgNO<sub>3</sub> FIL and KI FIL
